# Supplementary material
Source: PubMed Central journal article supplement (PMC2495072)
Supplement: mmc1.pdf [file mmc1.pdf]

## Supplemental Data

### Mutations in the Cilia Gene *ARL13B*

#### Lead to the Classical Form of Joubert Syndrome

Vincent Cantagrel Jennifer L. Silhavy, Stephanie L. Bielas, Dominika Swistun, Sarah E. Marsh, Julien Y. Bertrand, Sophie Audollent, Tania Attié-Bitach, Kenton R. Holden, William B. Dobyns, David Traver, Lihadh Al-Gazali, Bassam R. Ali, Thomas H. Lindner, Tamara Caspary, Edgar A. Otto, Friedhelm Hildebrandt, Ian A. Glass, Clare Gooding, Colin A. Johnson, Christopher Bennett, Francesco Brancati, The International Joubert Syndrome Related Disorders (JSRD) Study Group, Enza Maria Valente, C. Geoffrey Woods, and Joseph G. Gleeson

#### Other Members of the International JSRD Study Group

Padraic Grattan-Smith (Sydney, Australia); Richard Leventer (Victoria, Australia); Andreas Janecke (Innsbruck, Austria); Rudy Van Coster (Ghent, Belgium); Karin Dias, Carla Moco, Ana Moreira (Porto Alegre, Brazil); Chong Ae Kim (Sao Paulo, Brazil); Andrea Kiss (Porto Alegre, Brazil); Gustavo Maegawa (Toronto, Canada); Ghada M.H. Abdel-Salam, Alice Abdel-Aleem, Maha S. Zaki (Cairo, Egypt); Itxaso Marti, Susana Quijano-Roy (Garches, France); Pascale de Lonlay, Alain Verloes (Paris, France); Renaud Touraine (St. Etienne, France); Michel Koenig, Clotilde Lagier-Tourenne, Jean Messer (Strasbourg, France); Heike Philippi (Mainz, Germany); Sofia Kitsiou Tzeli (Athens, Greece); Saevar Halldorsson, Jonina Johannsdottir, Peter Ludvigsson, (Reykjavik, Iceland); Alex Magee (Belfast, Northern Ireland); Bernard Stuart (Dublin, Ireland) Dorit Lev, Marina Michelson (Holon, Israel); Bruria Ben-Zeev (Ramat-Gan, Israel); Rita Fischetto, Mattia Gentile (Bari, Italy); Silvia Battaglia, Lucio Giordano (Brescia, Italy); Loredana Boccone (Cagliari, Italy); Martino Ruggieri (Catania, Italy); Stefania Bigoni, Alessandra Ferlini (Ferrara, Italy); Maria Alice Donati, Elena Procopio, Elisabetta Lapi, Maurizio Genuardi (Florence, Italy); Gianluca Caridi, Francesca Faravelli, Gianmarco Ghiggeri (Genoa, Italy); Silvana Briuglia, Gaetano Tortorella, Luciana Rigoli, Carmelo D. Salpietro (Messina, Italy); Stefano D'Arrigo, Chiara Pantaleoni, Daria Riva, Graziella Uziel (Milan, Italy); Anna Maria Laverda, Alberto Permunian (Padova, Italy); Stefania Bova, Elisa Fazzi, Sabrina Signorini (Pavia, Italy); Roberta Battini (Pisa, Italy); Enrico Bertini, Bruno Dallapiccola, Maria Roberta Cilio, Marilù Di Sabato, Francesco Emma, Vincenzo Leuzzi, Pasquale Parisi (Rome, Italy); Alessandro Simonati (Verona, Italy); Asma A. Al-Tawari, Laila Bastaki, Ahmad Aqueel (Kuwait City, Kuwait); Mirjam M. de Jong (Groningen, The Netherlands); Roshan Koul, Anna Rajab (Muscat, Oman); Laszlo Sztrihai (Szeged, Hungary), Matloob Azam (Islamabad, Pakistan); Clara Barbot (Oporto, Portugal); Berta Rodriguez (La Coruna, Spain); Ignacio Pascual-Castroviejo (Madrid, Spain); Eugen Boltshauser (Zurich, Switzerland), Hulya Kayserili, Sinan Comu (Istanbul, Turkey); Mustafa Akcakus (Kayseri, Turkey); Yasin Sahin (Sahinbey, Turkey); Shubha R. Phadke (Lucknow, India), Nancy Melick, Mohammad Mikati (Beirut, Lebanon); David Nicholl (Birmingham, UK); Jane Hurst (Leeds, UK); Raoul C.M. Hennekam (London, UK); Saunder Bernes (Mesa, Arizona, US); Henry Sanchez (Fremont, California, US); Aldon E. Clark (Laguna Niguel, California, US); Anthony Wynshaw-Boris (San Diego, USA); Clement Donahue, Elliot H. Sherr, A. James Barkovich (San Francisco, California, US); Jin Hahn, Terence D. Sanger

(Stanford California, US); Tomas E. Gallagher (Manoa, Hawaii, US); Cynthia Daugherty (Bangor, Maine, US); Kalpathy S. Krishnamoorthy, Dean Sarco, Christopher A. Walsh, Janet Soul (Boston, Massachusetts, US); Trudy McKanna (Grand Rapids, Michigan, US); Joanne Milisa (Albuquerque, New Mexico, US); Wendy K. Chung, Darryl C. De Vivo, Hillary Raynes, Romaine Schubert (New York, New York, US); Alison Seward (Columbus, Ohio, US); David G. Brooks (Philadelphia, Pennsylvania, US); Amy Goldstein (Pittsburg, Pennsylvania, US); James Caldwell, Eco Finsecke (Tulsa, Oklahoma, US); Bernard L. Maria (Charleston, South Carolina, US), Robert P. Cruse, Timothy E. Lotze (Houston, Texas, US); Kathryn J. Swoboda, David H. Viskochil (Salt Lake City, Utah, US).

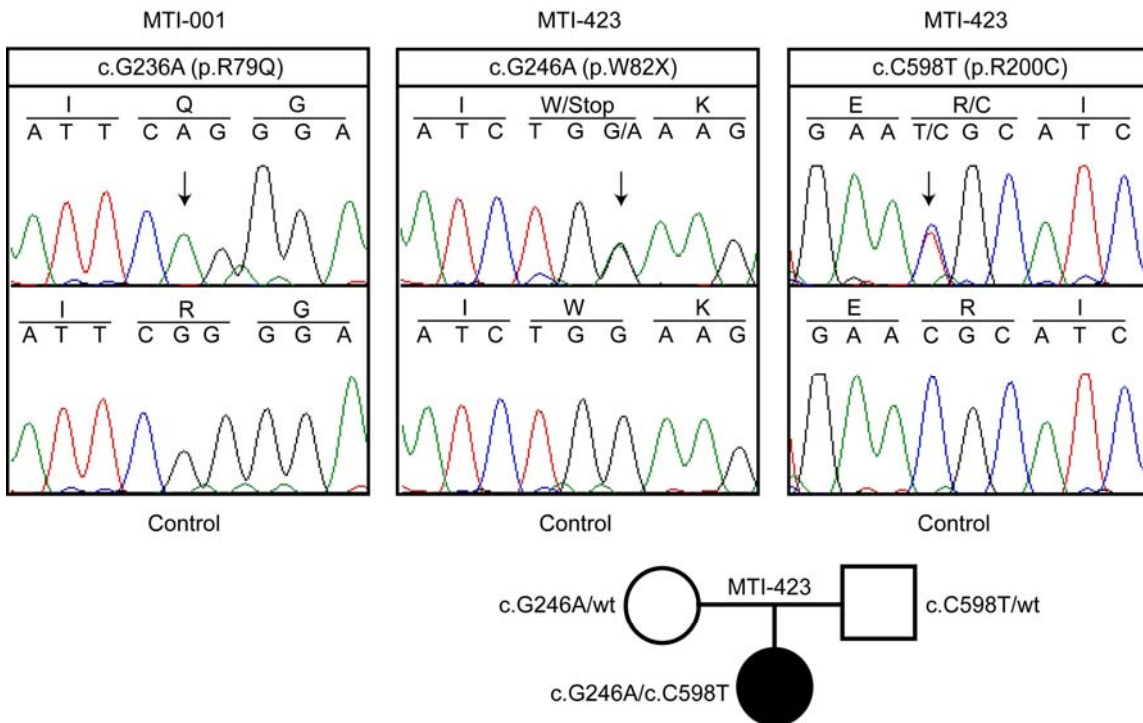

Figure S1. Sequence chromatograms two families with ARL13B mutations.

Pedigree structure for MTI-001 is provided in Fig. 1.

Left: Chromatogram for the homozygous c.G236A mutation in MTI-001, leading to an p.R79Q amino acid substitution. Middle: Chromatogram for the heterozygous c.G246A mutation, inherited from the mother, in MTI-423, leading to a premature stop codon (p.W82X).

Right: Chromatogram for the heterozygous c.C598T mutation, inherited from the father, in MTI-423, leading to an p.R200C amino acid substitution.

The affected girl has inherited both mutations. Control chromatograms at bottom.

Glutathione S-transferase

MSPILGYWKIKGLVQPTRLLEYLEEKYEEHLYERDEGDKWRNKKFELGLEFP  
 NLPYYIDGDVKLQSMAIIRYIADKHNMLGGCPKERAISMLEGAVLDIRYGVS  
 RIAYSKDFETLKVDFLSKLPEMLKMFEDRLCHKTYLNGDHVTHPDFMLYDALD  
 VVLYMDPMCLDAFPKLVCFKKRIEAIPIQIDKYLKSSKYIAWPLQGQWQATFGGG  
 DHPPKSDLEVLFFQGPLGSMFSLMASCCGWFKRWREPVRKVTLLMVGLDNAG  
 KTATAKGIQGEYPEDVAPT VGFSKINLRQGKFEVTIFDLGGGIRIRGIWKNYYA  
 ESYGVIFVVDSSDEERMEETKEAMSEMLRHPRISGKPIVLANKQDKEGALGE  
 ADVIECLSLEKLVNEHKCLCQIEPCSAISGYGKKIDKSIKKGLYWLLHVIARDFD  
 ALNERIQKETTEQRALEEQEKQERAERVRKLRREERKQNEQEQAEALDGTSGLA  
 ELDPEPTNPFQPIASVIIENEGKLEREKKNQKMEKDSDGCHLKHKMEHEQIET  
 QGQVNHNGQKNNEFGLVENYKEALTQQLKNEDETDPSLESANGKKKTKKL  
 RMKRNHRVEPLNIDDCAPESPTPPPPPPVVGWGTKVTRLPKLEPLGETHHN  
 DFYRKPLPPLAVPQRPNSDAHVIS\*

ARL13B

Figure S2. Sequence of the GST-ARL13B fusion, cloned into the pGEX-6P1 vector (see Methods section). Blue shows GST sequence, black shows the polylinker sequence and red shows the ARL13B sequence. In green is the R79, which is mutated to Q in family MTI-001.

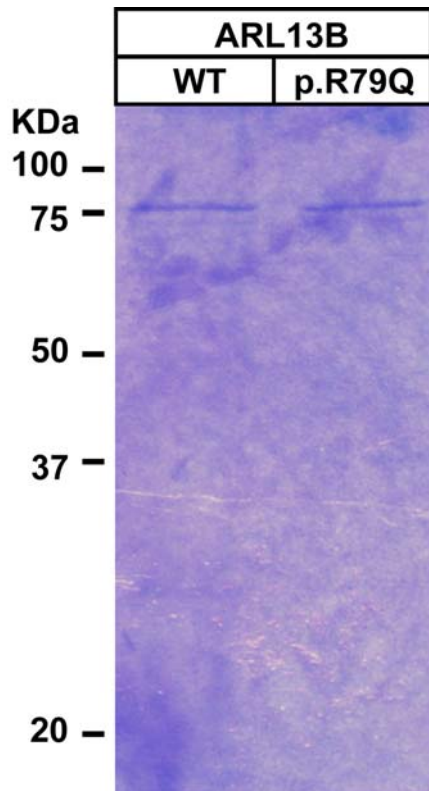

Figure S3. Coomassie-stained gel showing the purity of recombinant ARL13B wild-type and p.R79Q mutant protein (arrow).

## MTI-423

c.G246A (p.W82X); c.C598T (p.R200C)

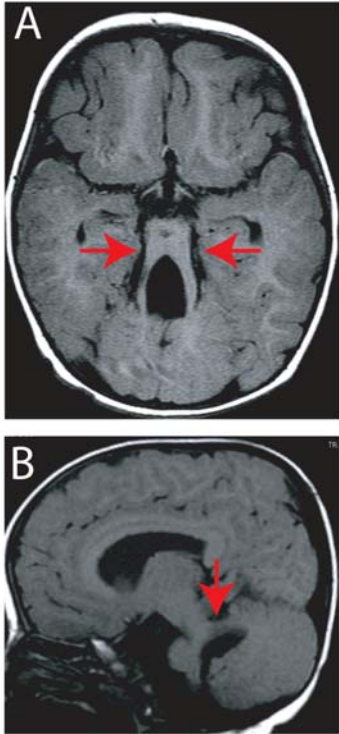

Figure S4. Molar tooth sign on brain MRI is evident in the affected girl from MTI-423 (red arrows in A).

Also evident is the horizontally-oriented superior cerebellar peduncle (red arrow in B), which is part of the JSRD diagnostic criteria. Identified mutation is listed above the brain MRI.

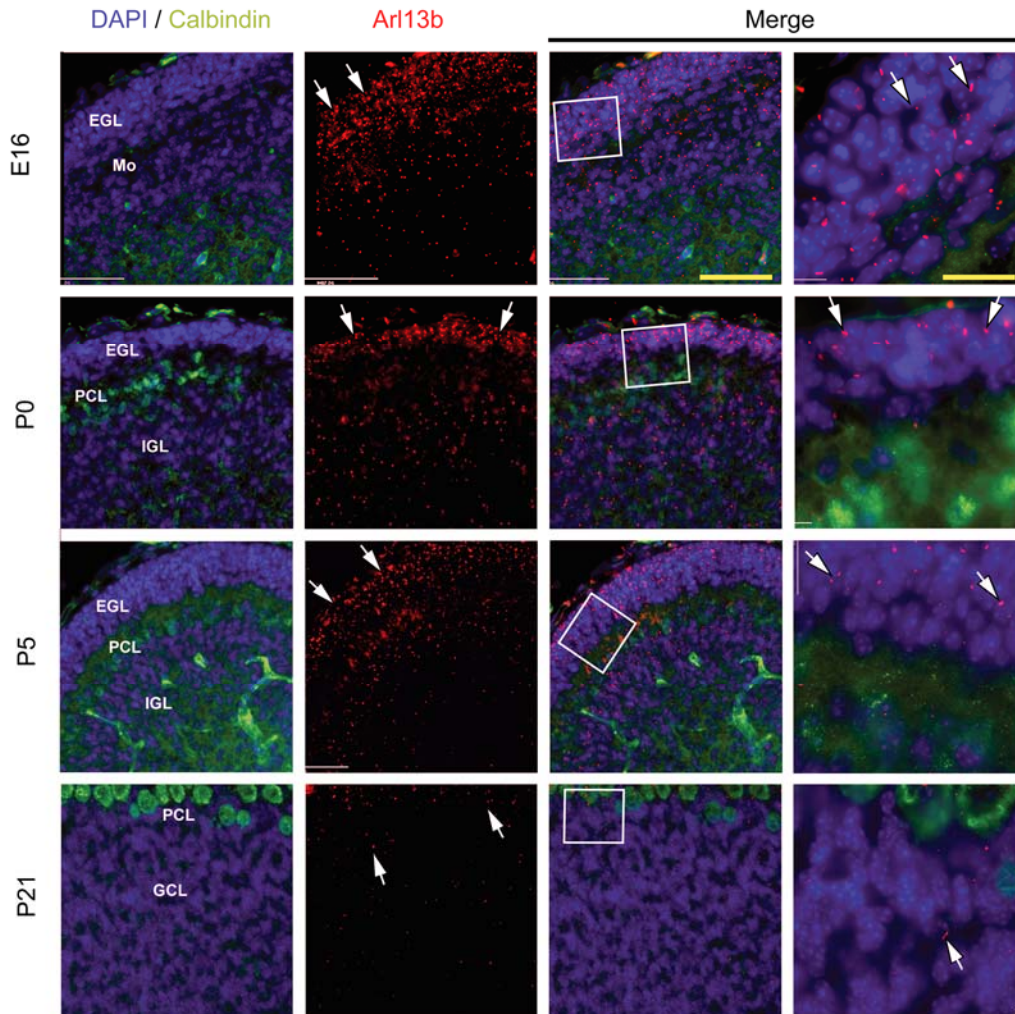

Figure S5. Arl13b is localized to cilia during the developmental spectrum of murine cerebellar development. Wildtype cerebellar parasagittal sections at ages shown on left, stained with Dapi (nuclei, blue), Calbindin (Purkinje cells, green), and Arl13b (red). (Note that some blood vessels have stained positive for calbindin in the IGL at P5). Boxed region indicates area of higher power magnification at right. At E16, Arl13b-positive cilia-like structures are noted for about 40% of granule cells in the EGL (arrows). The percentage of cells with Arl13b-positive cilia-like structures drops appreciably during postnatal ages, and by P21, fewer than 1% of granule cells in the IGL show a notable cilia. GCL - granule cell layer, EGL - external granule layer, IGL - internal granule cell layer, Mo - Molecular layer, PCL - Purkinje cell layer, Scale bar (yellow) = 100  $\mu$ m (low power), 40  $\mu$ m (high power).

| <b>Supplementary Table 1. Clinical findings of patients with <i>ARL13B</i> mutations</b>                                                                                                                                                                                                                                                                                                                |                                                                                    |                                                                                    |
|---------------------------------------------------------------------------------------------------------------------------------------------------------------------------------------------------------------------------------------------------------------------------------------------------------------------------------------------------------------------------------------------------------|------------------------------------------------------------------------------------|------------------------------------------------------------------------------------|
| <b>Demographic information</b>                                                                                                                                                                                                                                                                                                                                                                          |                                                                                    |                                                                                    |
| Family ID                                                                                                                                                                                                                                                                                                                                                                                               | MTI-001                                                                            | MTI-423                                                                            |
| Country of origin                                                                                                                                                                                                                                                                                                                                                                                       | Pakistan                                                                           | USA                                                                                |
| Patient (sex)                                                                                                                                                                                                                                                                                                                                                                                           | Three affecteds (IV-4, -6 and -8, see Fig. 1a)                                     | One affected (female)                                                              |
| Death                                                                                                                                                                                                                                                                                                                                                                                                   | IV-4 child died from complications of disease                                      | N                                                                                  |
| Documented consanguinity                                                                                                                                                                                                                                                                                                                                                                                | Y                                                                                  | N                                                                                  |
| <b>Genetic results</b>                                                                                                                                                                                                                                                                                                                                                                                  |                                                                                    |                                                                                    |
| Nucleotide change (exon) amino acid change Allele 1                                                                                                                                                                                                                                                                                                                                                     | c.G236A (exon 3) p.R79Q                                                            | c.G246A (exon3) p.W82X                                                             |
| Nucleotide change (exon) amino acid change Allele 2                                                                                                                                                                                                                                                                                                                                                     | c.G236A (exon 3) p.R79Q                                                            | c.C598T (exon 5) p.R200C                                                           |
| Mutation type                                                                                                                                                                                                                                                                                                                                                                                           | Homozygous                                                                         | Compound heterozygous                                                              |
| <b>Neurological signs</b>                                                                                                                                                                                                                                                                                                                                                                               |                                                                                    |                                                                                    |
| Hypotonia/ataxia                                                                                                                                                                                                                                                                                                                                                                                        | Y                                                                                  | Y                                                                                  |
| Psychomotor delay                                                                                                                                                                                                                                                                                                                                                                                       | Y                                                                                  | Y                                                                                  |
| Mental retardation                                                                                                                                                                                                                                                                                                                                                                                      | Y                                                                                  | Y                                                                                  |
| OMA                                                                                                                                                                                                                                                                                                                                                                                                     | Y                                                                                  | Y                                                                                  |
| Breathing abnormalities                                                                                                                                                                                                                                                                                                                                                                                 | N                                                                                  | Y                                                                                  |
| <b>Ocular signs</b>                                                                                                                                                                                                                                                                                                                                                                                     |                                                                                    |                                                                                    |
| Retinopathy                                                                                                                                                                                                                                                                                                                                                                                             | IV-4 (deceased) had retinopathy. Both IV-6 and IV-8 have normal retinas.           | Normal exam                                                                        |
| Other abnormalities                                                                                                                                                                                                                                                                                                                                                                                     | N                                                                                  | Ptosis                                                                             |
| Coloboma                                                                                                                                                                                                                                                                                                                                                                                                | N                                                                                  | N                                                                                  |
| <b>Renal signs</b>                                                                                                                                                                                                                                                                                                                                                                                      |                                                                                    |                                                                                    |
| NPH/UCD                                                                                                                                                                                                                                                                                                                                                                                                 | N                                                                                  | N                                                                                  |
| Kidney ultrasound                                                                                                                                                                                                                                                                                                                                                                                       | Normal at around 5 years of age in all.                                            | Normal at 13 months of age.                                                        |
| <b>Other organs</b>                                                                                                                                                                                                                                                                                                                                                                                     |                                                                                    |                                                                                    |
| Liver abnormalities                                                                                                                                                                                                                                                                                                                                                                                     | N                                                                                  | N                                                                                  |
| Polydactyly                                                                                                                                                                                                                                                                                                                                                                                             | N                                                                                  | N                                                                                  |
| <b>MRI reading</b>                                                                                                                                                                                                                                                                                                                                                                                      |                                                                                    |                                                                                    |
| MTS                                                                                                                                                                                                                                                                                                                                                                                                     | Y                                                                                  | Y                                                                                  |
| Other abnormalities                                                                                                                                                                                                                                                                                                                                                                                     | IV-4 and IV-6 with small occipital encephalocele, not seen in IV-8                 | Mildly enlarged ventricles                                                         |
| <b>Previous negative genetic screening</b>                                                                                                                                                                                                                                                                                                                                                              |                                                                                    |                                                                                    |
| Gene tested                                                                                                                                                                                                                                                                                                                                                                                             | <i>NPHP1</i> -, <i>AHI1</i> -, <i>CEP290</i> -, <i>RPGRIP1L</i> -, <i>TMEM67</i> - | <i>NPHP1</i> -, <i>AHI1</i> -, <i>CEP290</i> -, <i>RPGRIP1L</i> -, <i>TMEM67</i> - |
| Legend: ERG - electroretinogram, MTS - Molar tooth sign, NPHP - nephronophthisis, OMA - Oculomotor apraxia, UCD - urinary concentrating defect, <i>AHI1</i> - <i>ableson helper integration site 1</i> , <i>CEP290</i> - <i>centrosomal protein 290</i> , <i>NPHP1</i> - <i>nephrocystin 1</i> , <i>RPGRIP1L</i> - <i>RPGRIP1-like</i> , <i>TMEM67</i> (i.e. <i>MKS3</i> ) - <i>Meckel syndrome 3</i> . |                                                                                    |                                                                                    |
